# Supplementary material for: Metagenomic surveillance and comparative genomic analysis of Chlamydia psittaci in patients with pneumonia
Source: Front Microbiol. 2023 May 30;14:1157888. doi: 10.3389/fmicb.2023.1157888 (PMC10265514; doi:10.3389/fmicb.2023.1157888)
Supplement: Supplementary file 7 [file Table_7.xlsx]

## Sheet: Table S7
Table S7. Summary of positive selection scanning of genes encoding proteins involved in membrane biogenesis and virulence of C. psittaci.
OG ID	Symbol	p	ω	2ΔlnL	P-value	Positively selected sites	Annotation	COG	Localization	Function	Virulence factor	Major category	Pfam family
OG0569	yycJ	0.0894	201.954	77.7327	1.32e-17	211, 212, 213, 214, 218, 239, 241, 254, 260, 262	Putative metallo-hydrolase YycJ	P	CP	Zn-dependent hydrolase	TTSS secreted effectors	Effector delivery system	Lactamase_B_2 (PF12706) Beta-lactamase superfamily domain; Lactamase_B (PF00753) Metallo-beta-lactamase superfamily
OG0737	epsE	0.0576	29.5613	69.3071	8.92e-16	418, 469, 473, 474, 476, 477, 478, 479, 483, 484, 485, 486, 487, 492, 493, 494	Type II secretion system protein E	NUW	CP	general secretion pathway protein E	Lsp T2SS	Effector delivery system	T2SSE (PF00437) Type II/IV secretion system protein; T2SSE_N (PF05157) Type II secretion system (T2SS), protein E, N-terminal domain; AAA_16 (PF13191) AAA ATPase domain
OG0548	ompA	0.07031	4.30871	46.9859	6.27e-11	88, 169, 170, 171, 176, 251, 264, 336, 341	Major outer membrane porin	-	OM	outer membrane protein OmpA	MOMP	Adherence	Chlam_OMP (PF01308) Chlamydia major outer membrane protein; OMP_b-brl (PF13505) Outer membrane protein beta-barrel domain
OG0482	CT274	0.04958	96.6814	45.4981	1.32e-10	134, 135, 137, 139, 140, 142	hypothetical protein	R	CM	putative T3S chaperone	TTSS	Effector delivery system	TPR_2 (PF07719) Tetratricopeptide repeat; TPR_7 (PF13176) Tetratricopeptide repeat; TPR_9 (PF13371) Tetratricopeptide repeat; TPR_19 (PF14559) Tetratricopeptide repeat
OG0425	mrcA	0.05512	82.7068	30.7404	2.11e-07	85, 143, 144, 146, 147	hypothetical protein	-	CM	inclusion membrane protein MrcA	TTSS secreted effectors	Effector delivery system	-
OG0536	tlyC	0.16407	3.49131	26.5438	1.72e-06	4, 6, 10, 19, 23, 25, 28, 34, 38	hypothetical protein	R	CM	hemolysin C	TlyC	Exoenzyme	CorC_HlyC (PF03471) Transporter associated domain; CBS (PF00571) CBS domain
OG0590	CT_082	0.032	15.3185	26.4672	1.79e-06	559, 562, 565, 567, 570, 573, 574	hypothetical protein	-	OM	hypothetical protein	TTSS secreted effectors	Effector delivery system	-
OG0448	murG	0.05549	30.7654	25.6579	2.68e-06	34, 37, 39, 43, 46, 47, 304	UDP-N-acetylglucosamine--N-acetylmuramyl-(pentapeptide) pyrophosphoryl-undecaprenol N-acetylglucosamine transferase	M	CM	-	-	-	Glyco_tran_28_C (PF04101) Glycosyltransferase family 28 C-terminal domain; Glyco_transf_28 (PF03033) Glycosyltransferase family 28 N-terminal domain
OG0722	cdsZ	0.08492	7.07789	23.5442	7.72e-06	230, 239, 240, 241, 244, 249, 251	hypothetical protein	R	CP	hypothetical protein	TTSS secreted effectors	Effector delivery system	zf-RING_7 (PF02591) C4-type zinc ribbon domain
OG0561	CT_203	0.06373	13.1602	22.3229	1.42e-05	146, 204, 207, 210, 219	hypothetical protein	S	CP	hypothetical protein	TTSS secreted effectors	Effector delivery system	DUF1186 (PF06685) Protein of unknown function (DUF1186)
OG0781	fliI	0.04806	9.13632	20.9129	2.88e-05	412, 417, 421, 426, 427	Flagellum-specific ATP synthase	NU	CP	type III secretion system ATPase	TTSS	Effector delivery system	ATP-synt_ab (PF00006) ATP synthase alpha/beta family, nucleotide-binding domain; T3SS_ATPase_C (PF18269) T3SS EscN ATPase C-terminal domain
OG0373	aaxA	0.00243	76.9139	15.8363	0.000364	14	Porin AaxA	M	NA	-	-	-	OprB (PF04966) Carbohydrate-selective porin, OprB family
OG0774	NUE	0.07833	9.69175	15.2891	0.000479	204, 208, 212, 214, 220	hypothetical protein	R	CP	hypothetical protein	TTSS secreted effectors	Effector delivery system	SET (PF00856) SET domain
OG0765	cdsG	0.05546	13.0509	14.9704	0.000561	132, 135, 149	hypothetical protein	R	NA	Type III secretion system protein CdsG	TTSS	Effector delivery system	-
OG0549	copD	0.20882	2.16491	10.2416	0.005971		hypothetical protein	-	NA	Type III secretion system translocator CopD	TTSS	Effector delivery system	SseC (PF04888) Secretion system effector C (SseC) like family
OG0586	-	0.03328	22.0523	10.1678	0.006196		hypothetical protein	MO	NA	-	-	-	OmpH (PF03938) Outer membrane protein (OmpH-like)
OG0502	murB	0.03882	19.6313	9.20973	0.010003		UDP-N-acetylenolpyruvoylglucosamine reductase	M	NA	MurB family protein	Capsule	Immune modulation	MurB_C (PF02873) UDP-N-acetylenolpyruvoylglucosamine reductase, C-terminal domain; FAD_binding_4 (PF01565) FAD binding domain
OG0498	copD2	0.02385	9.31176	8.34733	0.015396	134	hypothetical protein	-	CP	Type III secretion system translocator CopD2	TTSS	Effector delivery system	-
OG0468	-	0.08305	3.30415	8.29782	0.015782	49	hypothetical protein	M	CM	-	-	-	-
OG0612	mcsc	0.02231	13.6417	6.93098	0.031258	151	hypothetical protein	S	CP	T3S chaperone	TTSS secreted effectors	Effector delivery system	YbjN (PF10722) Putative bacterial sensory transduction regulator
OG0452	gsiA	0.07181	3.36499	5.09467	0.07829		Glutathione import ATP-binding protein GsiA	E	CM	iron(III) ABC transporter, ATP-binding protein	HitABC	Nutritional/Metabolic factor	ABC_tran (PF00005) ABC transporter; oligo_HPY (PF08352) Oligopeptide/dipeptide transporter, C-terminal region; SMC_N (PF02463) RecF/RecN/SMC N terminal domain; AAA_21 (PF13304) AAA domain, putative AbiEii toxin, Type IV TA system; AAA_22 (PF13401) AAA domain
OG0530	lspA	0.19202	2.89045	4.3576	0.11318		Lipoprotein signal peptidase	MU	CM	-	-	-	Peptidase_A8 (PF01252) Signal peptidase (SPase) II
OG0297	CT_849	0.02473	27.4673	4.03317	0.13311		hypothetical protein	-	EC	hypothetical protein	TTSS secreted effectors	Effector delivery system	DUF720 (PF05302) Protein of unknown function (DUF720)
OG0755	glmU	0.04214	7.8957	3.94831	0.13888		Bifunctional protein GlmU	M	CP	-	-	-	Hexapep (PF00132) Bacterial transferase hexapeptide (six repeats)
OG0289	glmM	0.00377	8.61236	3.73679	0.15437		Phosphoglucosamine mutase	G	CP	phosphomannomutase/phosphoglucomutase	Capsule	Immune modulation	PGM_PMM_I (PF02878) Phosphoglucomutase/phosphomannomutase, alpha/beta/alpha domain I; PGM_PMM_III (PF02880) Phosphoglucomutase/phosphomannomutase, alpha/beta/alpha domain III; PGM_PMM_II (PF02879) Phosphoglucomutase/phosphomannomutase, alpha/beta/alpha domain II; PGM_PMM_IV (PF00408) Phosphoglucomutase/phosphomannomutase, C-terminal domain
OG0710	uppS	0.01085	19.3209	3.73669	0.15438		Ditrans,polycis-undecaprenyl-diphosphate synthase ((2E,6E)-farnesyl-diphosphate specific)	I	CP	undecaprenyl diphosphate synthase	Capsule	Immune modulation	Prenyltransf (PF01255) Putative undecaprenyl diphosphate synthase
OG0423	CT_142	0.05651	3.1522	3.71815	0.15582		hypothetical protein	-	EC	hypothetical protein	TTSS secreted effectors	Effector delivery system	-
OG0295	pknD_1	0.04159	5.51408	3.63426	0.16249		Serine/threonine-protein kinase PknD	T	NA	serine/threonine protein kinase PpkA	HSI-1	Effector delivery system	Pkinase (PF00069) Protein kinase domain; PK_Tyr_Ser-Thr (PF07714) Protein tyrosine and serine/threonine kinase; Pkinase_fungal (PF17667) Fungal protein kinase
OG0551	groL_2	0.00584	24.9581	3.33711	0.18852		60 kDa chaperonin	O	CP	chaperonin GroEL	GroEL	Adherence	Cpn60_TCP1 (PF00118) TCP-1/cpn60 chaperonin family
OG0668	lpxB	0.02296	4.1272	2.93136	0.23092		Lipid-A-disaccharide synthase	R	CM	lipid-A-disaccharide synthase	LOS	Immune modulation	LpxB (PF02684) Lipid-A-disaccharide synthetase; LAB_N (PF07578) Lipid A Biosynthesis N-terminal domain
OG0323	cysA	0.00519	40.9307	2.55756	0.27838		Sulfate/thiosulfate import ATP-binding protein CysA	M	CM	iron(III) ABC transporter, ATP-binding protein	FbpABC	Nutritional/Metabolic factor	ABC_tran (PF00005) ABC transporter
OG0659	CT_858	0.0223	6.06043	2.3939	0.30211		Protein CT_858	O	NA	serine protease	CPAF	Exoenzyme	Peptidase_S41 (PF03572) Peptidase family S41; PDZ_4 (PF17816) PDZ domain
OG0411	sigD	0.01618	5.94263	2.29063	0.31812		RNA polymerase sigma-D factor	K	CP	RNA polymerase sigma factor sigma-28	TTSS secreted effectors	Effector delivery system	Sigma70_r4 (PF04545) Sigma-70, region 4; Sigma70_r2 (PF04542) Sigma-70 region 2; Sigma70_r4_2 (PF08281) Sigma-70, region 4
OG0556	cdsO	0.06492	2.80723	2.18679	0.33508		hypothetical protein	-	CP	Type III secretion system protein CdsO, YscO homolog	TTSS	Effector delivery system	YscO-like (PF16789) YscO-like protein
OG0358	-	0.00337	51.2839	1.46179	0.48148		hypothetical protein	GM	NA	-	-	-	BNR_2 (PF13088) BNR repeat-like domain
OG0390	yscN	0.02272	1	1.30173	0.52159		putative ATP synthase YscN	NU	CP	Type III secretion system ATPase	TTSS	Effector delivery system	ATP-synt_ab (PF00006) ATP synthase alpha/beta family, nucleotide-binding domain; T3SS_ATPase_C (PF18269) T3SS EscN ATPase C-terminal domain; ATP-synt_ab_N (PF02874) ATP synthase alpha/beta family, beta-barrel domain
OG0414	CT_847	0.10246	3.86638	1.16775	0.55773		hypothetical protein	-	NA	Type III secretion system effector	TTSS secreted effectors	Effector delivery system	DUF720 (PF05302) Protein of unknown function (DUF720)
OG0494	bioF_1	0.12685	1.99814	1.10329	0.576		8-amino-7-oxononanoate synthase 2	H	CP	8-amino-7-oxononanoate synthase	Biotin synthesis	Nutritional/Metabolic factor	Aminotran_1_2 (PF00155) Aminotransferase class I and II; Cys_Met_Meta_PP (PF01053) Cys/Met metabolism PLP-dependent enzyme; Beta_elim_lyase (PF01212) Beta-eliminating lyase
OG0557	cdsP	0.17893	1.9505	1.09923	0.57717		putative protein CT_671	-	NA	Type III secretion system protein CdsP, YscP homolog	TTSS	Effector delivery system	DUF5421 (PF17458) Family of unknown function (DUF5421)
OG0341	copN	0.06658	3.3334	0.999886	0.60657		hypothetical protein	-	NA	Type III secretion system effector CopN	TTSS secreted effectors	Effector delivery system	HrpJ (PF07201) HrpJ-like domain
OG0791	yidC	0.00293	22.2457	0.996932	0.60746		Membrane protein insertase YidC	M	CM	-	-	-	60KD_IMP (PF02096) 60Kd inner membrane protein
OG0346	CT_550	1	999	0.98147	0.61218		hypothetical protein	-	NA	hypothetical protein	TTSS secreted effectors	Effector delivery system	-
OG0435	scc2	0.09587	2.407	0.704048	0.70326		hypothetical protein	R	CP	chaperone for CopD	TTSS	Effector delivery system	TPR_3 (PF07720) Tetratricopeptide repeat; ANAPC3 (PF12895) Anaphase-promoting complex, cyclosome, subunit 3; TPR_16 (PF13432) Tetratricopeptide repeat; TPR_2 (PF07719) Tetratricopeptide repeat
OG0784	-	0.00479	21.2692	0.549282	0.75984		hypothetical protein	M	CP	-	-	-	MlaD (PF02470) MlaD protein
OG0547	CT_577	0.09715	2.3108	0.506434	0.7763		hypothetical protein	-	NA	hypothetical protein	TTSS secreted effectors	Effector delivery system	-
OG0427	hemW	0.06783	1.90918	0.47131	0.79005		Heme chaperone HemW	H	CP	Putative oxygen independent coproporphyrinogen III oxidase	Chu	Nutritional/Metabolic factor	Radical_SAM (PF04055) Radical SAM superfamily
OG0384	groL_1	0.00542	14.7048	0.437358	0.80358		60 kDa chaperonin	O	CP	chaperonin GroEL	GroEL	Adherence	Cpn60_TCP1 (PF00118) TCP-1/cpn60 chaperonin family
OG0647	bioB	0.08291	1.59314	0.032402	0.98393		Biotin synthase	H	CP	biotin synthase	Biotin synthesis	Nutritional/Metabolic factor	BATS (PF06968) Biotin and Thiamin Synthesis associated domain; Radical_SAM (PF04055) Radical SAM superfamily
OG0850	lpxA	0.02635	4.31888	0.031938	0.98416		Acyl-[acyl-carrier-protein]--UDP-N-acetylglucosamine O-acyltransferase	M	CP	UDP-N-acetylglucosamine acyltransferase	LOS	Immune modulation	Hexapep (PF00132) Bacterial transferase hexapeptide (six repeats); Acetyltransf_11 (PF13720) Udp N-acetylglucosamine O-acyltransferase; Domain 2
OG0703	yidD	0.06575	2.48447	0.024684	0.98773		Putative membrane protein insertion efficiency factor	M	NA	hypothetical protein	TTSS secreted effectors	Effector delivery system	YidD (PF01809) Putative membrane protein insertion efficiency factor
OG0418	yscU	0.10408	1.21869	0.01544	0.99231		Yop proteins translocation protein U	N	CM	Type III secretion protein CdsU	TTSS	Effector delivery system	Bac_export_2 (PF01312) FlhB HrpN YscU SpaS Family
OG0428	incV	0.27503	1.01652	0.004698	0.99765		hypothetical protein	-	CM	inclusion membrane protein IncV	TTSS secreted effectors	Effector delivery system	DUF5423 (PF17461) Family of unknown function (DUF5423)
OG0531	lpxK	0.28619	1.03838	0.002752	0.99862		Tetraacyldisaccharide 4'-kinase	M	NA	tetraacyldisaccharide 4'-kinase	LOS	Immune modulation	LpxK (PF02606) Tetraacyldisaccharide-1-P 4'-kinase
OG0683	murD	0.29621	1.04832	0.002108	0.99895		UDP-N-acetylmuramoylalanine--D-glutamate ligase	M	CP	-	-	-	Mur_ligase_M (PF08245) Mur ligase middle domain; Mur_ligase_C (PF02875) Mur ligase family, glutamate ligase domain
OG0766	cdsQ	0.05007	1.37844	0.000814	0.99959		hypothetical protein	NU	NA	Type III secretion system C-ring protein CdsQ	TTSS	Effector delivery system	FliMN_C (PF01052) Type III flagellar switch regulator (C-ring) FliN C-term
OG0479	slc1	0	1	0.000376	0.99981		hypothetical protein	-	CP	T3S chaperone for TARP, CT875	TTSS	Effector delivery system	CesT (PF05932) Tir chaperone protein (CesT) family
OG0798	CT_848	0	1	0.00039	0.99981		hypothetical protein	-	EC	hypothetical protein	TTSS secreted effectors	Effector delivery system	DUF720 (PF05302) Protein of unknown function (DUF720)
OG0339	CT_718	0	1	0.000358	0.99982		hypothetical protein	NU	CP	hypothetical protein	TTSS secreted effectors	Effector delivery system	-
OG0723	clpP1	0	1	0.000338	0.99983		ATP-dependent Clp protease proteolytic subunit 1	O	CP	ATP-dependent Clp protease proteolytic subunit	ClpP	Stress survival	CLP_protease (PF00574) Clp protease
OG0524	rcsC	0.03189	1	0.000308	0.99985		Sensor histidine kinase RcsC	T	CM	flagellar sensor histidine kinase FleS	Flagella	Motility	HisKA (PF00512) His Kinase A (phospho-acceptor) domain; HATPase_c (PF02518) Histidine kinase-, DNA gyrase B-, and HSP90-like ATPase; PAS (PF00989) PAS fold; PAS_9 (PF13426) PAS domain
OG0704	atoC	0	24.3329	0.00027	0.99987		Regulatory protein AtoC	T	CP	sigma-54 dependent response regulator	Flagella	Motility	Sigma54_activat (PF00158) Sigma-54 interaction domain; Response_reg (PF00072) Response regulator receiver domain; Sigma54_activ_2 (PF14532) Sigma-54 interaction domain
OG0821	murC	0	1	0.00024	0.99988		UDP-N-acetylmuramate--L-alanine ligase	MR	CP	-	-	-	Dala_Dala_lig_C (PF07478) D-ala D-ala ligase C-terminus; Mur_ligase (PF01225) Mur ligase family, catalytic domain; Dala_Dala_lig_N (PF01820) D-ala D-ala ligase N-terminus; Mur_ligase_M (PF08245) Mur ligase middle domain; Mur_ligase_C (PF02875) Mur ligase family, glutamate ligase domain; CPSase_L_D2 (PF02786) Carbamoyl-phosphate synthase L chain, ATP binding domain
OG0655	pgi	0	1	0.000212	0.99989		Glucose-6-phosphate isomerase	G	CP	glucose-6-phosphate isomerase	Capsule	Immune modulation	PGI (PF00342) Phosphoglucose isomerase
OG0881	degQ	0	1	0.000228	0.99989		hypothetical protein	R	PP	serine protease MucD precursor	Alginate	Biofilm	Trypsin_2 (PF13365) Trypsin-like peptidase domain; PDZ_2 (PF13180) PDZ domain; PDZ_6 (PF17820) PDZ domain; Peptidase_M50 (PF02163) Peptidase family M50; PDZ (PF00595) PDZ domain; Trypsin (PF00089) Trypsin; Tricorn_PDZ (PF14685) Tricorn protease PDZ domain; GRASP55_65 (PF04495) GRASP55/65 PDZ-like domain; PDZ_1 (PF12812) PDZ-like domain; Peptidase_S46 (PF10459) Peptidase S46
OG0886	sigA	0	1	0.000224	0.99989		RNA polymerase sigma factor SigA	K	CP	RNA polymerase sigma factor SigA	SigA	Regulation	Sigma70_r3 (PF04539) Sigma-70 region 3; Sigma70_r2 (PF04542) Sigma-70 region 2; Sigma70_r4 (PF04545) Sigma-70, region 4; Sigma70_r1_1 (PF03979) Sigma-70 factor, region 1.1; Sigma70_r1_2 (PF00140) Sigma-70 factor, region 1.2
OG0438	CT_143	0.2573	1	0.000202	0.9999		hypothetical protein	-	NA	hypothetical protein	TTSS secreted effectors	Effector delivery system	-
OG0707	CBU_1566	0	1	0.00018	0.99991		putative transcriptional regulatory protein	KJ	CP	Coxiella Dot/Icm type IVB secretion system translocated effector	T4SS secreted effectors	Effector delivery system	Transcrip_reg (PF01709) Transcriptional regulator
OG0649	bioA	0.06191	1	0.000126	0.99994		Adenosylmethionine-8-amino-7-oxononanoate aminotransferase	H	CP	adenosylmethionine-8-amino-7-oxononanoate aminotransferase	Biotin synthesis	Nutritional/Metabolic factor	Aminotran_3 (PF00202) Aminotransferase class-III
OG0708	murA	0	1	0.000128	0.99994		UDP-N-acetylglucosamine 1-carboxyvinyltransferase	M	CP	-	-	-	EPSP_synthase (PF00275) EPSP synthase (3-phosphoshikimate 1-carboxyvinyltransferase)
OG0514	dacF	0	1	9.2e-05	0.99995		hypothetical protein	M	CM	-	-	-	Peptidase_S11 (PF00768) D-alanyl-D-alanine carboxypeptidase; Beta-lactamase2 (PF13354) Beta-lactamase enzyme family
OG0762	CT_656	0	1	9.2e-05	0.99995		hypothetical protein	-	NA	hypothetical protein	TTSS secreted effectors	Effector delivery system	-
OG0795	fabZ	0	43.6949	0.00011	0.99995		3-hydroxyacyl-[acyl-carrier-protein] dehydratase FabZ	I	CP	(3R)-hydroxymyristoyl ACP dehydratase	LPS	Immune modulation	FabA (PF07977) FabA-like domain
OG0601	CT_053	0	1	9e-05	0.99996		hypothetical protein	-	CP	hypothetical protein	TTSS secreted effectors	Effector delivery system	-
OG0620	clpC	0	1	8e-05	0.99996		ATP-dependent Clp protease ATP-binding subunit ClpC	O	CP	endopeptidase Clp ATP-binding chain C	ClpC	Stress survival	AAA_2 (PF07724) AAA domain (Cdc48 subfamily); AAA_lid_9 (PF17871) AAA lid domain; Clp_N (PF02861) Clp amino terminal domain, pathogenicity island component; AAA (PF00004) ATPase family associated with various cellular activities (AAA); ClpB_D2-small (PF10431) C-terminal, D2-small domain, of ClpB protein; AAA_5 (PF07728) AAA domain (dynein-related subfamily); AAA_16 (PF13191) AAA ATPase domain; Si…
OG0812	cdsF	0	1	9e-05	0.99996		putative protein CT_666	-	NA	Type III secretion system needle-filament protein CdsF	TTSS	Effector delivery system	DUF5407 (PF17401) Family of unknown function (DUF5407)
OG0604	-	0	1	5.4e-05	0.99997		hypothetical protein	M	CP	-	-	-	SpoIID (PF08486) Stage II sporulation protein
OG0615	murE	0	1	5.6e-05	0.99997		UDP-N-acetylmuramoyl-L-alanyl-D-glutamate--2,6-diaminopimelate ligase	M	CP	-	-	-	Mur_ligase_M (PF08245) Mur ligase middle domain; Mur_ligase_C (PF02875) Mur ligase family, glutamate ligase domain; Mur_ligase (PF01225) Mur ligase family, catalytic domain
OG0831	gnd	0	1	6.8e-05	0.99997		6-phosphogluconate dehydrogenase, decarboxylating	G	NA	NADP-dependent phosphogluconate dehydrogenase	Capsule	Immune modulation	6PGD (PF00393) 6-phosphogluconate dehydrogenase, C-terminal domain; NAD_binding_2 (PF03446) NAD binding domain of 6-phosphogluconate dehydrogenase
OG0275	mntB_2	0	26.4623	3.2e-05	0.99998		Manganese transport system ATP-binding protein MntB	P	CM	ABC transporter ATP-binding protein MntA	MntABC	Stress survival	ABC_tran (PF00005) ABC transporter; SMC_N (PF02463) RecF/RecN/SMC N terminal domain; AAA_21 (PF13304) AAA domain, putative AbiEii toxin, Type IV TA system; AAA_29 (PF13555) P-loop containing region of AAA domain
OG0300	rpe	0	1	3.4e-05	0.99998		Ribulose-phosphate 3-epimerase	G	CP	ribulose-phosphate 3-epimerase	Capsule	Immune modulation	Ribul_P_3_epim (PF00834) Ribulose-phosphate 3 epimerase family
OG0308	CT_429	0	1	4.6e-05	0.99998		hypothetical protein	-	CP	hypothetical protein	TTSS secreted effectors	Effector delivery system	UPF0158 (PF03682) Uncharacterised protein family (UPF0158)
OG0397	glgX	0	19.7579	3.8e-05	0.99998		Glycogen operon protein GlgX	G	CP	glycogen hydrolase	TTSS secreted effectors	Effector delivery system	Alpha-amylase (PF00128) Alpha amylase, catalytic domain; CBM_48 (PF02922) Carbohydrate-binding module 48 (Isoamylase N-terminal domain)
OG0734	yscL	0	1	4.6e-05	0.99998		Yop proteins translocation protein L	NU	CP	type III secretion translocase	TTSS	Effector delivery system	FliH (PF02108) Flagellar assembly protein FliH
OG0797	clpP	0	1	4.4e-05	0.99998		ATP-dependent Clp protease proteolytic subunit	O	CP	ATP-dependent Clp protease proteolytic subunit	ClpP	Stress survival	CLP_protease (PF00574) Clp protease
OG0878	-	0	10.2781	4.2e-05	0.99998		hypothetical protein	M	CP	-	-	-	LysM (PF01476) LysM domain
OG0266	fabF	0	1	1.2e-05	0.99999		3-oxoacyl-[acyl-carrier-protein] synthase 2	IQ	CP	putative 3-ketoacyl-ACP synthase CylI	haemolysin/cytolysin	Exotoxin	ketoacyl-synt (PF00109) Beta-ketoacyl synthase, N-terminal domain; Ketoacyl-synt_C (PF02801) Beta-ketoacyl synthase, C-terminal domain
OG0311	murF	0	1	1.2e-05	0.99999		UDP-N-acetylmuramoyl-tripeptide--D-alanyl-D-alanine ligase	M	CP	-	-	-	Mur_ligase_M (PF08245) Mur ligase middle domain; Mur_ligase (PF01225) Mur ligase family, catalytic domain; Mur_ligase_C (PF02875) Mur ligase family, glutamate ligase domain
OG0333	pal	0	1	2.4e-05	0.99999		Peptidoglycan-associated lipoprotein	M	OM	-	-	-	OmpA (PF00691) OmpA family
OG0361	cadD	0	1	1.4e-05	0.99999		putative oxidoreductase CT_610	H	CP	type III secreted effector	TTSS secreted effectors	Effector delivery system	TENA_THI-4 (PF03070) TENA/THI-4/PQQC family; Haem_oxygenas_2 (PF14518) Iron-containing redox enzyme
OG0377	mntA	0	1	2e-05	0.99999		Manganese-binding lipoprotein MntA	P	CM	periplasmic binding protein MntC	MntABC	Stress survival	ZnuA (PF01297) Zinc-uptake complex component A periplasmic
OG0387	incC	0	1	1.4e-05	0.99999		hypothetical protein	-	CM	Inclusion Membrane Protein C	TTSS secreted effectors	Effector delivery system	-
OG0576	lolD	0	1	1.2e-05	0.99999		Lipoprotein-releasing system ATP-binding protein LolD	M	CM	ATP-binding protein AatC	Dispersin	Others	ABC_tran (PF00005) ABC transporter; SMC_N (PF02463) RecF/RecN/SMC N terminal domain
OG0587	lpxD	0	1	1.2e-05	0.99999		UDP-3-O-acylglucosamine N-acyltransferase	M	CP	UDP-3-O-	3-hydroxymyristoyl] glucosamine N-acyltransferase [LPS	Immune modulation	Hexapep (PF00132) Bacterial transferase hexapeptide (six repeats); LpxD (PF04613) UDP-3-O-[3-hydroxymyristoyl] glucosamine N-acyltransferase, LpxD
OG0656	scc3	0	1	2e-05	0.99999		hypothetical protein	R	CP	chaperone	TTSS	Effector delivery system	TPR_3 (PF07720) Tetratricopeptide repeat
OG0694	lnt	0	1	1.4e-05	0.99999		Apolipoprotein N-acyltransferase	M	CM	-	-	-	CN_hydrolase (PF00795) Carbon-nitrogen hydrolase
OG0742	-	0	1	1.4e-05	0.99999		hypothetical protein	M	NA	-	-	-	LysM (PF01476) LysM domain
OG0836	ntpA	0	1	2.6e-05	0.99999		V-type sodium ATPase catalytic subunit A	C	CP	flagellum-specific ATP synthase	Polar flagella	Motility	ATP-synt_ab (PF00006) ATP synthase alpha/beta family, nucleotide-binding domain; ATP-synt_ab_Xtn (PF16886) ATPsynthase alpha/beta subunit N-term extension; ATP-synt_ab_N (PF02874) ATP synthase alpha/beta family, beta-barrel domain
OG0871	lgt	0	1	2.6e-05	0.99999		Phosphatidylglycerol--prolipoprotein diacylglyceryl transferase	M	CM	-	-	-	LGT (PF01790) Prolipoprotein diacylglyceryl transferase
OG0264	amiC	0	1	4e-06	1		N-acetylmuramoyl-L-alanine amidase AmiC	M	NA	-	-	-	Amidase_3 (PF01520) N-acetylmuramoyl-L-alanine amidase
OG0269	prpC	0	74.5576	-0.089216	1		Protein phosphatase PrpC	T	CP	Pseudomonas protein phosphatase PppA	HSI-1	Effector delivery system	PP2C_2 (PF13672) Protein phosphatase 2C; PP2C (PF00481) Protein phosphatase 2C
OG0278	CT_668	0	1	-0.000104	1		hypothetical protein	-	NA	putative TTSS related protein	TTSS secreted effectors	Effector delivery system	-
OG0280	ntpB	0	1	-2e-05	1		V-type sodium ATPase subunit B	C	CP	flagellum-specific ATP synthase FliI	Flagella	Motility	ATP-synt_ab (PF00006) ATP synthase alpha/beta family, nucleotide-binding domain; ATP-synt_ab_N (PF02874) ATP synthase alpha/beta family, beta-barrel domain
OG0281	orfM	0	1	4e-06	1		dITP/XTP pyrophosphatase	F	CP	deoxyribonucleotide triphosphate pyrophosphatase	LOS	Immune modulation	Ham1p_like (PF01725) Ham1 family
OG0291	uhpC	0	1	-0.00019	1		Membrane sensor protein UhpC	G	CM	hexose phosphate transport protein	Hpt	Nutritional/Metabolic factor	MFS_1 (PF07690) Major Facilitator Superfamily
OG0299	scc1	0	1	0	1		hypothetical protein	-	NA	chaperone for CopN	TTSS	Effector delivery system	CesT (PF05932) Tir chaperone protein (CesT) family
OG0327	bioF_2	0	1	4e-06	1		8-amino-7-oxononanoate synthase	H	CP	8-amino-7-oxononanoate synthase	Biotin synthesis	Nutritional/Metabolic factor	Aminotran_1_2 (PF00155) Aminotransferase class I and II
OG0328	cpoB	0	1	2e-06	1		Cell division coordinator CpoB	M	NA	-	-	-	TPR_16 (PF13432) Tetratricopeptide repeat; TPR_2 (PF07719) Tetratricopeptide repeat; TPR_6 (PF13174) Tetratricopeptide repeat; YfiO (PF13525) Outer membrane lipoprotein; TPR_1 (PF00515) Tetratricopeptide repeat; TPR_19 (PF14559) Tetratricopeptide repeat; TPR_8 (PF13181) Tetratricopeptide repeat; TPR_14 (PF13428) Tetratricopeptide repeat; TPR_12 (PF13424) Tetratricopeptide repeat
OG0332	CT_606.1	0	1	2e-06	1		hypothetical protein	-	NA	hypothetical protein	TTSS secreted effectors	Effector delivery system	-
OG0344	fabG	0	1	2e-06	1		3-oxoacyl-[acyl-carrier-protein] reductase FabG	IQR	CP	short chain dehydrogenase/reductase family oxidoreductase	Polar flagella	Motility	adh_short_C2 (PF13561) Enoyl-(Acyl carrier protein) reductase; adh_short (PF00106) short chain dehydrogenase; KR (PF08659) KR domain
OG0359	cdsE	0	55.3452	4e-06	1		hypothetical protein	-	NA	Type III secretion system protein CdsE	TTSS	Effector delivery system	DUF5398 (PF17376) Family of unknown function (DUF5398)
OG0460	CT_383	0.11877	1	0	1		hypothetical protein	-	CM	hypothetical protein	TTSS secreted effectors	Effector delivery system	-
OG0475	CT_083	0	1	0	1		hypothetical protein	-	NA	hypothetical protein	TTSS secreted effectors	Effector delivery system	-
OG0562	oppD_2	0	1	-0.000372	1		Oligopeptide transport ATP-binding protein OppD	EP	CM	iron(III) ABC transporter, ATP-binding protein	HitABC	Nutritional/Metabolic factor	ABC_tran (PF00005) ABC transporter; SMC_N (PF02463) RecF/RecN/SMC N terminal domain; oligo_HPY (PF08352) Oligopeptide/dipeptide transporter, C-terminal region; AAA_21 (PF13304) AAA domain, putative AbiEii toxin, Type IV TA system; AAA_15 (PF13175) AAA ATPase domain
OG0575	ykfC	0	1	2e-06	1		hypothetical protein	M	CP	-	-	-	NLPC_P60 (PF00877) NlpC/P60 family
OG0584	fabD	0	1	8e-06	1		Malonyl CoA-acyl carrier protein transacylase	I	CP	colibactin biosynthesis acyltransferase ClbG	Colibactin	Exotoxin	Acyl_transf_1 (PF00698) Acyl transferase domain
OG0585	bamA	0	1	4e-06	1		Outer membrane protein assembly factor BamA	M	OM	-	-	-	POTRA (PF07244) Surface antigen variable number repeat; Omp85 (PF01103) Omp85 superfamily domain; POTRA_1 (PF08478) POTRA domain, FtsQ-type
OG0685	hemN	0.0247	1	0	1		Oxygen-independent coproporphyrinogen III oxidase	H	CP	Putative oxygen independent coproporphyrinogen III oxidase	Chu	Nutritional/Metabolic factor	Radical_SAM (PF04055) Radical SAM superfamily
OG0692	mip	0	30.8465	8e-06	1		hypothetical protein	O	OM	macrophage infectivity potentiator Mip	Mip	Post-translational modification	FKBP_C (PF00254) FKBP-type peptidyl-prolyl cis-trans isomerase; FKBP_N (PF01346) Domain amino terminal to FKBP-type peptidyl-prolyl isomerase
OG0717	pmpA	0.03415	1	-0.002962	1		putative outer membrane protein pmp19	S	OM	polymorphic membrane protein PmpA	Pmps	Adherence	ChlamPMP_M (PF07548) Chlamydia polymorphic membrane protein middle domain; Chlam_PMP (PF02415) Chlamydia polymorphic membrane protein (Chlamydia_PMP) repeat; Autotransporter (PF03797) Autotransporter beta-domain
OG0736	epsF	0	1	4e-06	1		Type II secretion system protein F	NUW	CM	general secretion pathway protein F	Xcp secretion system	Effector delivery system	T2SSF (PF00482) Type II secretion system (T2SS), protein F
OG0744	ahpC	0	18.097	1e-05	1		Alkyl hydroperoxide reductase C	V	CP	alkyl hydroperoxide reductase subunit AhpC	AhpC	Stress survival	AhpC-TSA (PF00578) AhpC/TSA family; Redoxin (PF08534) Redoxin; 1-cysPrx_C (PF10417) C-terminal domain of 1-Cys peroxiredoxin
OG0746	rpoN	0	1	4e-06	1		RNA polymerase sigma-54 factor	K	CP	RNA polymerase factor sigma-54	Type IV pili	Adherence	Sigma54_DBD (PF04552) Sigma-54, DNA binding domain; Sigma54_CBD (PF04963) Sigma-54 factor, core binding domain; Sigma54_AID (PF00309) Sigma-54 factor, Activator interacting domain (AID)
OG0760	kdsA	0	11.1412	0	1		2-dehydro-3-deoxyphosphooctonate aldolase	M	CP	2-dehydro-3-deoxyphosphooctonate aldolase	LPS	Immune modulation	DAHP_synth_1 (PF00793) DAHP synthetase I family
OG0764	scc4	0	1	2e-06	1		hypothetical protein	-	NA	chaperone for CopN	TTSS	Effector delivery system	CesT (PF05932) Tir chaperone protein (CesT) family
OG0772	kdsB	0	1	-0.000192	1		8-amino-3,8-dideoxy-manno-octulosonate cytidylyltransferase	M	CP	3-deoxy-manno-octulosonate cytidylyltransferase	K1 capsule	Invasion	CTP_transf_3 (PF02348) Cytidylyltransferase; NTP_transf_3 (PF12804) MobA-like NTP transferase domain
OG0773	fbpC2	0.02887	1	0	1		Fe(3+) ions import ATP-binding protein FbpC 2	P	CM	iron(III) ABC transporter, ATP-binding protein	HitABC	Nutritional/Metabolic factor	ABC_tran (PF00005) ABC transporter; AAA_21 (PF13304) AAA domain, putative AbiEii toxin, Type IV TA system; AAA_13 (PF13166) AAA domain; AAA_22 (PF13401) AAA domain; SMC_N (PF02463) RecF/RecN/SMC N terminal domain; AAA_16 (PF13191) AAA ATPase domain
OG0783	CT_712	0.05575	1	0	1		hypothetical protein	S	NA	type III secretion system effector protein	TTSS secreted effectors	Effector delivery system	Effector_1 (PF04518) Effector from type III secretion system
OG0785	mlaE	0	1	4e-06	1		Intermembrane phospholipid transport system permease protein MlaE	M	CM	-	-	-	MlaE (PF02405) Permease MlaE
OG0809	cdsS	0	1	-0.00013	1		hypothetical protein	U	CM	Yop proteins translocation protein S	TTSS	Effector delivery system	Bac_export_3 (PF01313) Bacterial export proteins, family 3
OG0837	-	0	1	-1e-05	1		hypothetical protein	MN	CM	-	-	-	LptF_LptG (PF03739) Lipopolysaccharide export system permease LptF/LptG
OG0854	sodB	0	1	6e-06	1		Superoxide dismutase [Mn/Fe]	P	PP	superoxide dismutase	SodA	Stress survival	Sod_Fe_N (PF00081) Iron/manganese superoxide dismutases, alpha-hairpin domain; Sod_Fe_C (PF02777) Iron/manganese superoxide dismutases, C-terminal domain
OG0874	CT_565	0	1	0	1		hypothetical protein	-	CM	hypothetical protein	TTSS secreted effectors	Effector delivery system	-
OG0884	lpxC	0	1	6e-06	1		UDP-3-O-acyl-N-acetylglucosamine deacetylase	M	CP	UDP-3-O-(R-3-hydroxymyristoyl)-N-acetylglucosamine deacetylase	LOS	Immune modulation	LpxC (PF03331) UDP-3-O-acyl N-acetylglycosamine deacetylase
OG0887	cdsJ	0	1	-0.000148	1		hypothetical protein	U	NA	Type III secretion system inner membrane ring complex protein CdsJ	TTSS	Effector delivery system	YscJ_FliF (PF01514) Secretory protein of YscJ/FliF family
OG0888	spaR	0	1	2e-06	1		Surface presentation of antigens protein SpaR	U	CM	Yop proteins translocation protein T	TTSS	Effector delivery system	Bac_export_1 (PF01311) Bacterial export proteins, family 1
